# Supplementary material
Source: PubMed Central journal article supplement (PMC5546877)
Supplement: NIHMS871979-supplement-supplement_1.pdf [file NIHMS871979-supplement-supplement_1.pdf]

# APPENDIX

**Appendix-Table S1.** Association of clinical characteristics with hypokalemia (serum potassium  $\leq 3.6$  vs  $>3.6$  to  $\leq 5.0$  mEq/L) among whites, African-Americans, and Hispanics in case-mix + MICS adjusted logistic regression models.

| Factors                           | Race                  |               |  |                               |               |  |                          |               |  |
|-----------------------------------|-----------------------|---------------|--|-------------------------------|---------------|--|--------------------------|---------------|--|
|                                   | Whites,<br>OR(95% CI) |               |  | African-Americans, OR(95% CI) |               |  | Hispanics,<br>OR(95% CI) |               |  |
| <b>Socio-demographic factors</b>  |                       |               |  |                               |               |  |                          |               |  |
| Age, $\Delta$ 10-y                | 0.88                  | (0.85 – 0.92) |  | 1.00                          | (0.96 – 1.04) |  | 0.97                     | (0.88 – 1.06) |  |
| Female, vs Male                   | 1.09                  | (0.98 – 1.21) |  | 1.18                          | (1.06 – 1.31) |  | 1.06                     | (0.84 – 1.34) |  |
| <b>Comorbidity factors</b>        |                       |               |  |                               |               |  |                          |               |  |
| DM                                | 0.87                  | (0.79 – 0.97) |  | 1.05                          | (0.95 – 1.16) |  | 0.89                     | (0.71 – 1.13) |  |
| Hypertension                      | 1.22                  | (1.10 – 1.34) |  | 1.17                          | (1.06 – 1.28) |  | 1.19                     | (0.97 – 1.47) |  |
| Congestive heart failure          | 0.93                  | (0.84 – 1.04) |  | 1.07                          | (0.97 – 1.18) |  | 0.99                     | (0.80 – 1.23) |  |
| BMI, $\Delta$ 1 kg/m <sup>2</sup> | 1.01                  | (1.00 – 1.02) |  | 1.00                          | (0.99 – 1.00) |  | 1.02                     | (1.00 – 1.03) |  |
| <b>Socioeconomic factors</b>      |                       |               |  |                               |               |  |                          |               |  |
| Medicaid, vs Medicare             | 1.02                  | (0.80 – 1.31) |  | 1.08                          | (0.90 – 1.29) |  | 0.81                     | (0.57 – 1.14) |  |
| Other, vs Medicare                | 0.96                  | (0.87 – 1.07) |  | 0.98                          | (0.89 – 1.08) |  | 0.93                     | (0.75 – 1.15) |  |
| <b>Dialysis related factors</b>   |                       |               |  |                               |               |  |                          |               |  |
| Access type : AVF, vs CVC         | 1.14                  | (0.99 – 1.32) |  | 1.17                          | (1.01 – 1.37) |  | 0.84                     | (0.58 – 1.23) |  |
| Access type: AVG, vs CVC          | 1.46                  | (1.16 – 1.85) |  | 1.20                          | (0.99 – 1.45) |  | 0.78                     | (0.39 – 1.55) |  |
| Access type: Others, vs CVC       | 2.12                  | (0.49 – 9.20) |  | 0.76                          | (0.18 – 3.20) |  | n/a                      |               |  |
| Access type: Unknown, vs CVC      | 1.51                  | (1.27 – 1.80) |  | 1.33                          | (1.12 – 1.58) |  | 1.34                     | (0.90 – 2.01) |  |
| spKt/V, $\Delta$ 0.1 unit         | 1.03                  | (1.01 – 1.05) |  | 1.02                          | (1.00 – 1.04) |  | 1.00                     | (0.96 – 1.04) |  |
| HD time, $\Delta$ 10 min/session  | 0.98                  | (0.96 – 1.01) |  | 1.01                          | (0.99 – 1.04) |  | 1.04                     | (0.99 – 1.09) |  |
| Ultrafiltration, $\Delta$ 1 kg    | 0.85                  | (0.80 – 0.91) |  | 0.78                          | (0.73 – 0.84) |  | 0.69                     | (0.59 – 0.80) |  |
| pre-HD SBP, $\Delta$ 10 mmHg      | 0.94                  | (0.91 – 0.97) |  | 0.93                          | (0.90 – 0.96) |  | 0.85                     | (0.79 – 0.93) |  |
| <b>Nutritional factors</b>        |                       |               |  |                               |               |  |                          |               |  |
| Albumin, $\Delta$ 0.1 g/dl        | 0.94                  | (0.92 – 0.95) |  | 0.94                          | (0.93 – 0.95) |  | 0.92                     | (0.90 – 0.95) |  |
| Phosphorus, $\Delta$ 0.1 mg/dl    | 0.97                  | (0.96 – 0.98) |  | 0.97                          | (0.96 – 0.97) |  | 0.96                     | (0.95 – 0.97) |  |
| BUN, $\Delta$ 1 mg/dl             | 0.96                  | (0.96 – 0.97) |  | 0.96                          | (0.96 – 0.97) |  | 0.96                     | (0.95 – 0.98) |  |
| nPCR, $\Delta$ 0.1 g/kg/day       | 0.98                  | (0.93 – 1.02) |  | 1.00                          | (0.95 – 1.05) |  | 1.05                     | (0.95 – 1.16) |  |

Case-mix + MICS models adjusted for age, sex, diabetes mellitus, primary insurance, vascular access type, spKt/V, HD treatment time, UF, and cardiovascular risk factors including pre-HD systolic BP, pre-HD diastolic BP, BMI, comorbidities, 13 surrogates of nutritional and/or inflammatory status (albumin, hemoglobin, peripheral WBC, lymphocyte percentage, ferritin, TIBC, calcium, phosphorus, bicarbonate, BUN, iPTH, nPCR, and ESA dose).

Abbreviations: OR, odds ratio; CI, confidence interval; BMI, body mass index; AVF, arteriovenous fistula; CVC, central venous catheter; spKt/V, single pool Kt/V; HD, hemodialysis; SBP, systolic blood pressure; BUN, blood urea nitrogen; nPCR, normalized protein catabolic rate

**Appendix-Figure S1.** Algorithm (flow chart) of patient selection for the cohort.

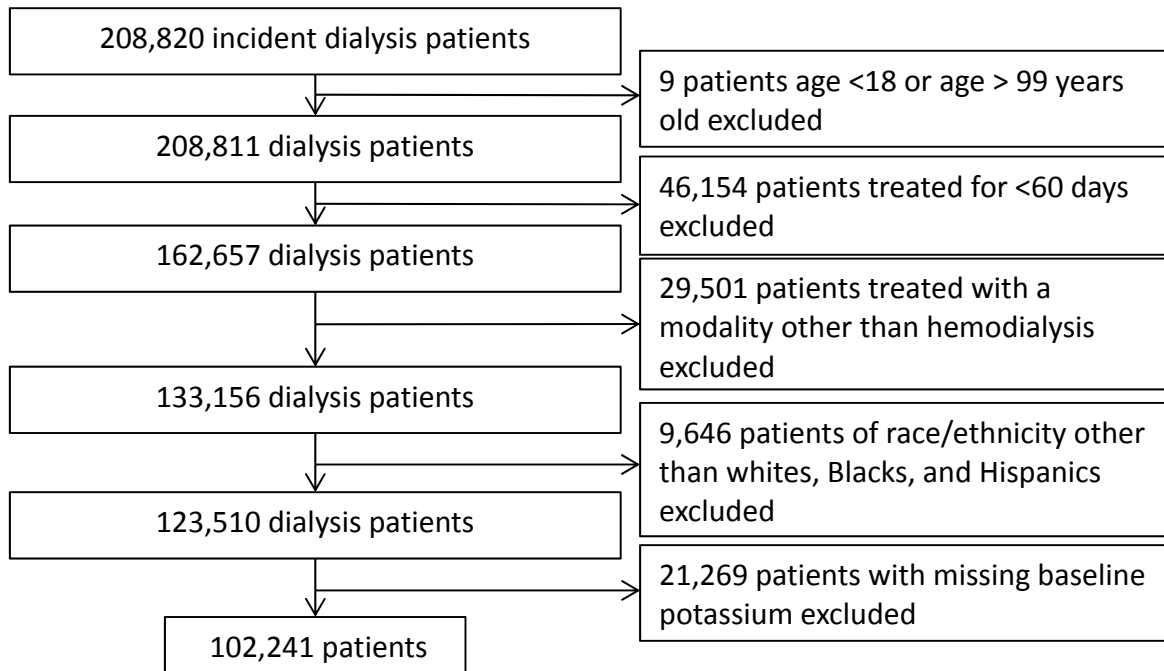

**Appendix-Figure S2.** Association between serum potassium and all-cause mortality across race/ethnicity in restricted cubic spline analyses with knots defined at the 33<sup>rd</sup> and 66<sup>th</sup> percentiles of observed values for each racial/ethnic group in case-mix + MICS models: (A) whites (knots at 4.2 and 4.6 mEq/L), (B) African-Americans (knots at 4.2 and 4.6 mEq/L), and (C) Hispanics (knots at 4.3 and 4.8 mEq/L).

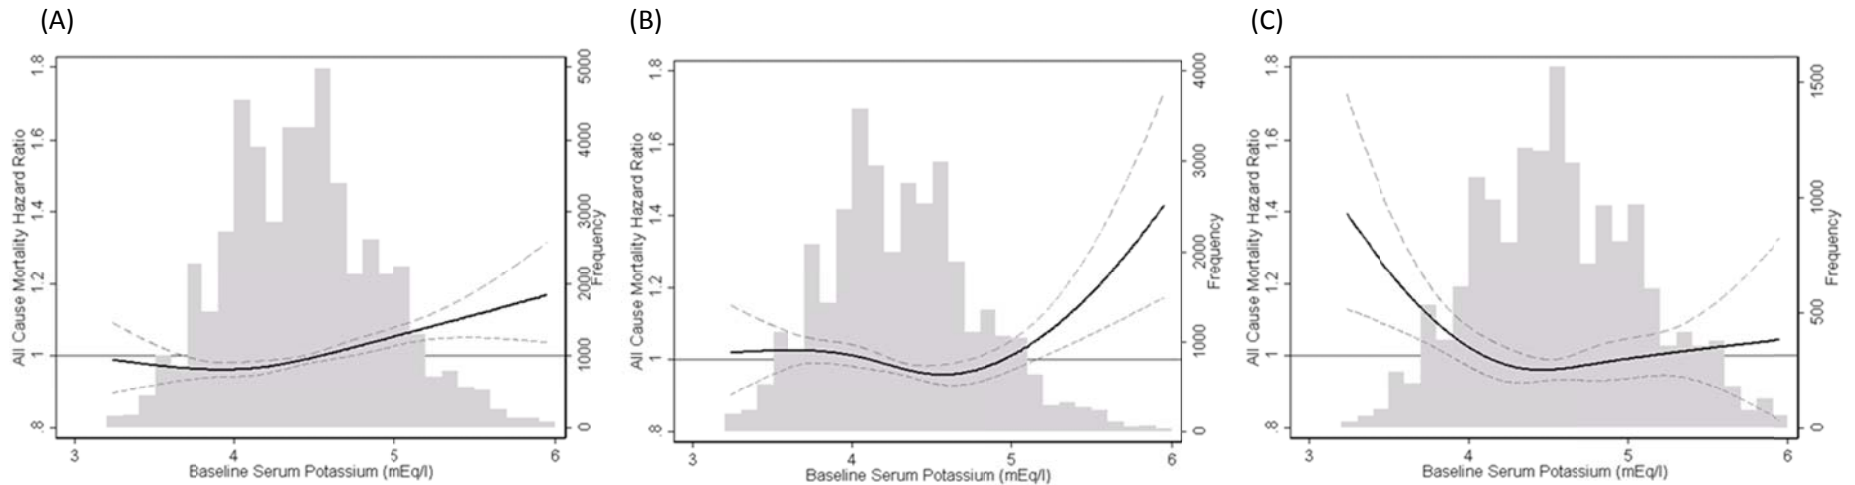

Case-mix + MICS models adjusted for age, sex, diabetes mellitus, primary insurance, vascular access type, spKt/V, HD treatment time, UF, and cardiovascular risk factors including pre-HD systolic BP, pre-HD diastolic BP, BMI, comorbidities, 13 surrogates of nutritional and/or inflammatory status (albumin, hemoglobin, peripheral WBC, lymphocyte percentage, ferritin, TIBC, calcium, phosphorus, bicarbonate, BUN, iPTH, nPCR, and ESA dose).

**Appendix-Figure S3.** Competing risks analyses of the association between 18 groups stratified by race and baseline serum potassium with all-cause mortality (reference: Hispanics with serum potassium >4.0 to 4.5 mEq/l) in case-mix + MICS adjusted Cox models, accounting for the competing risk of transplantation. (solid circle: standard Cox regression analyses, open circle: competing risks regression analyses)

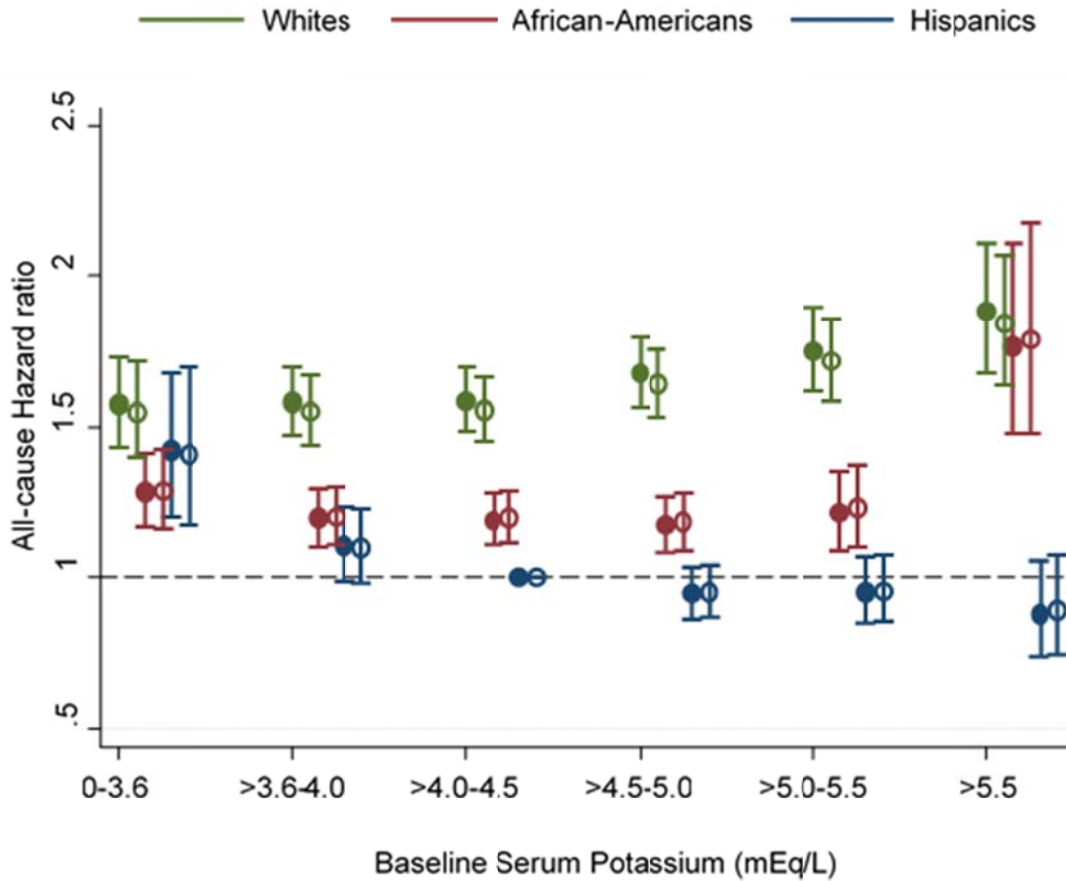

Case-mix + MICS models adjusted for age, sex, diabetes mellitus, primary insurance, vascular access type, spKt/V, HD treatment time, UF, and cardiovascular risk factors including pre-HD systolic BP, pre-HD diastolic BP, BMI, comorbidities, 13 surrogates of nutritional and/or inflammatory status (albumin, hemoglobin, peripheral WBC, lymphocyte percentage, ferritin, TIBC, calcium, phosphorus, bicarbonate, BUN, iPTH, nPCR, and ESA dose).

**Appendix-Figure S4.** Association between hypokalemia (serum potassium  $\leq 3.60$  mEq/L) with all-cause mortality (reference: normal serum potassium  $>3.6$  to  $\leq 5.0$  mEq/L) across clinically relevant subgroups stratified by race/ethnicity in case-mix + MICS adjusted Cox models. (A) whites, (B) African-Americans, (C) Hispanics.

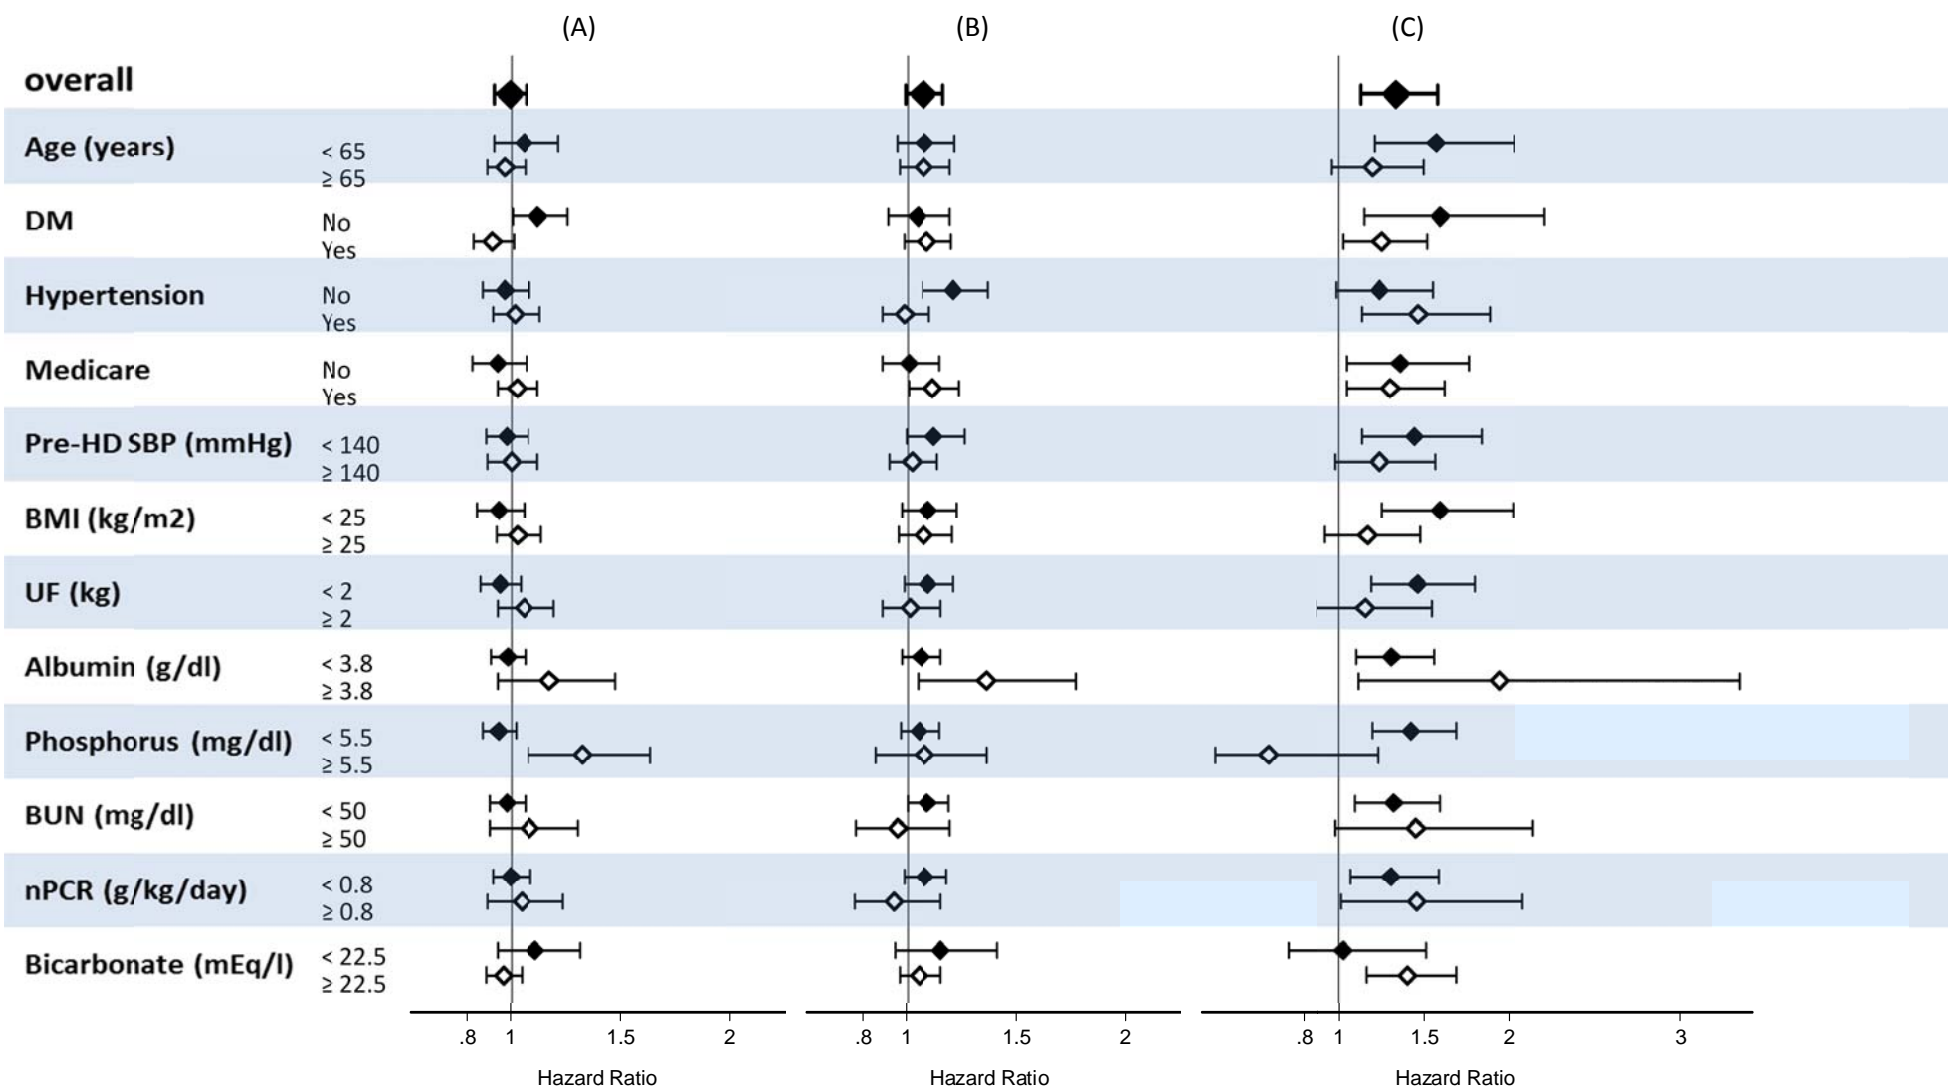

Case-mix + MICS models adjusted for age, sex, diabetes mellitus, primary insurance, vascular access type, spKt/V, HD treatment time, UF, and cardiovascular risk factors including pre-HD systolic BP, pre-HD diastolic BP, body mass index (BMI), comorbidities, 12 surrogates of nutritional and/or inflammatory status (albumin, hemoglobin, peripheral WBC, lymphocyte percentage, ferritin, TIBC, calcium, phosphorus, bicarbonate, BUN, iPTH, nPCR, and ESA dose).

Abbreviations: DM, diabetes mellitus; HD, hemodialysis; SBP, systolic blood pressure; BMI, body mass index; UF, ultrafiltration; BUN, blood urea nitrogen; nPCR, normalized protein catabolic rate.

**Appendix-Figure S5.** Association between serum potassium level and all-cause mortality across race/ethnicity in analyses adjusted for case-mix + MICS covariates as well as residual renal function in (A) 20,988 whites (B) 10,684 African-Americans (C) 4,238 Hispanics in 35,910 patients with available data on residual renal function.

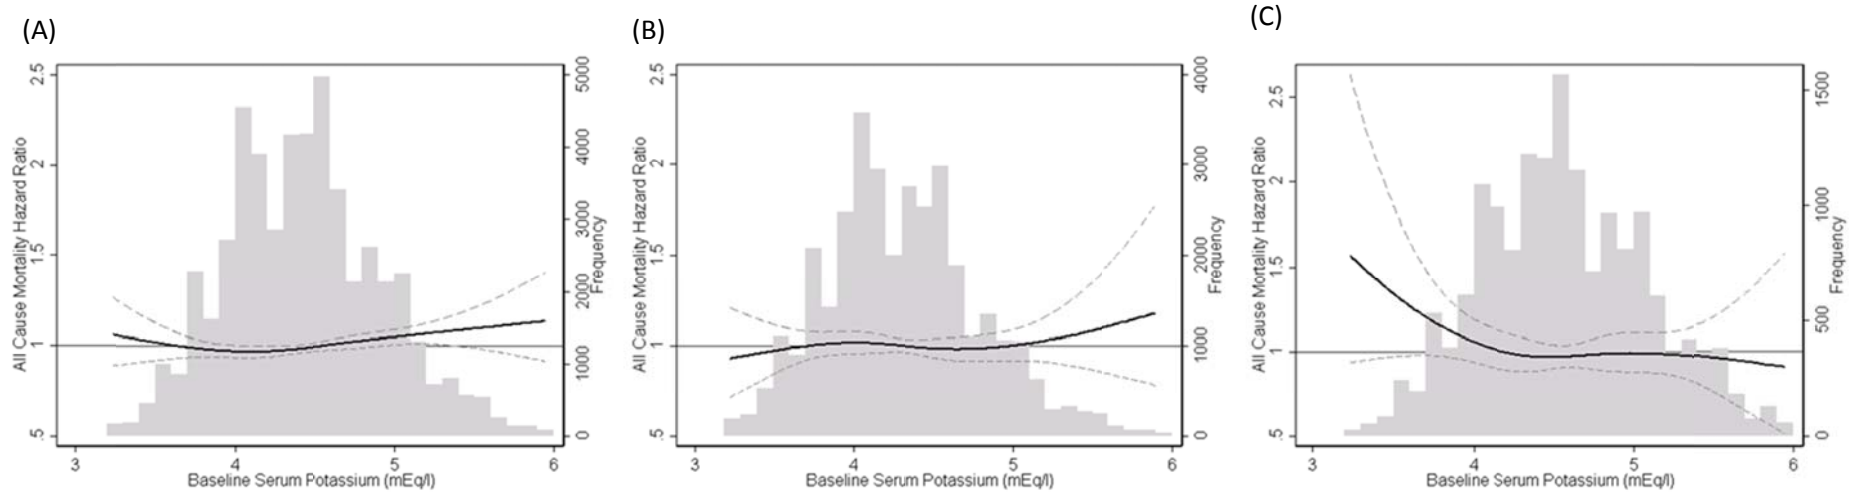

Case-mix + MICS models adjusted for age, sex, diabetes mellitus, primary insurance, vascular access type, spKt/V, HD treatment time, UF, and cardiovascular risk factors including pre-HD systolic BP, pre-HD diastolic BP, body mass index (BMI), comorbidities, 12 surrogates of nutritional and/or inflammatory status (albumin, hemoglobin, peripheral WBC, lymphocyte percentage, ferritin, TIBC, calcium, phosphorus, bicarbonate, BUN, iPTH, nPCR, and ESA dose) and residual renal function
